# Supplementary material for: Analysing the spatial variation of soil respiration during the early growing season of different grasslands in China
Source: PeerJ. 2024 Nov 28;12:e18480. doi: 10.7717/peerj.18480 (PMC11608563; doi:10.7717/peerj.18480)
Supplement: Data S1 — (A) grassland type (B) soil respiration (C) lalitude (D) longitude (E) soil temperature (F) soil water content (G) soil organic carbon (H) total nitrogen (I) total carbon (J) C:N [file peerj-12-18480-s001.xlsx]

## Sheet: Shee1
grassland type	soil respiration	latitude	longitude	soil temperature(℃)	soil water content(%)	soil organic carbon(g/kg)	total nitrogen(%)	total carbon (%)	C:N
DS	0.49	42.6322	112.784	12.5433	2.9	6	0.145977	0.800688	5.48504
DS	0.74	42.9297	112.73	12.6233	4.26667	3.84167	0.102928	0.52596	5.10997
DS	0.396667	43.1065	112.893	14.37	8.8	4.94074	0.123837	0.788768	6.3694
DS	0.443333	43.3295	113.084	13.0733	7.7	3.66912	0.103772	0.775819	7.47619
DS	0.58	43.5425	113.25	15.1233	3.16667	2.6644	0.1	0.34	3.4
DS	0.73	43.8206	113.633	14.0233	6.13333	5.37674	0.116475	0.691765	5.93919
DS	0.243333	43.9146	114.429	13.5933	8.7	5.57895	0.134722	0.681441	5.05814
TS	0.496667	43.8647	114.17	14.23	6.46667	9.71415	0.195493	1.72611	8.82953
TS	1.30333	43.9287	116.289	12.6233	10.7	13.2456	0.229731	1.76891	7.69993
TS	2.34	43.7495	116.602	10.2733	16.5667	20.1401	0.28	2.35	8.39286
TS	1.48	43.8221	116.51	17.7033	8.13333	14.8368	0.228936	1.7348	7.57767
TS	2.32333	43.8856	116.364	11.28	25.1667	15.3919	0.229593	2.37316	10.3364
TS	0.47	43.7399	116.106	19.4533	9.76667	14.4225	0.227018	1.85004	8.14927
TS	1.61	43.553	116.128	15.09	5.63333	8.93589	0.154369	1.14482	7.41613
TS	0.633333	44.0536	116.236	11.52	3.03333	5.57176	0.13	0.7	5.38462
TS	1.16	44.4926	117.326	10.79	9.73333	6.4466	0.12784	0.78821	6.16559
TS	0.556667	44.4413	117.054	11.1833	8.86667	19.1531	0.279318	2.57921	9.23396
TS	1.15	44.3722	116.8	11.5	13.5	17.4266	0.285491	2.6235	9.18946
MM	2.4413	37.6169	101.328	4.94136	40.3185	84.9624	0.99	9.76	9.85859
